# Supplementary material for: Comparison of different spectral cameras for image-guided organ transplantation
Source: PubMed Central journal article supplement (PMC8305772; doi:10.1117/1.jbo.26.7.076007), 2021-07-24
Supplement: JBO_026_076007_SD001.pdf [file JBO_026_076007_SD001.pdf]

# 1 Supplementary Material

Table S1: This table shows the spectral peak and FWHM of each band for all used snapshot cameras and filters. The bands are sorted, starting with lowest  $\lambda$ , and the numeration does not correspond to the index positions on the sensor.

|   |        | Band #         | 0      | 1    | 2    | 3    | 4    | 5    | 6    | 7    | 8    | 9    | 10   | 11   | 12   |  |
|---|--------|----------------|--------|------|------|------|------|------|------|------|------|------|------|------|------|--|
| T | 3x3    | $\lambda$ [nm] | 424    | 457  | 497  | 534  | 561  | 599  | 640  | 680  |      |      |      |      |      |  |
|   | Camera | FWHM           | 51     | 45   | 36   | 32   | 30   | 29   | 27   | 26   |      |      |      |      |      |  |
|   | -----  |                |        |      |      |      |      |      |      |      |      |      |      |      |      |  |
|   | 4x4    | $\lambda$ [nm] | 463    | 471  | 478  | 489  | 490  | 504  | 518  | 531  | 543  | 567  | 580  | 592  | 603  |  |
|   | Camera | FWHM           | 10.8   | 15.5 | 20.2 | 10.8 | 12.1 | 10.8 | 9.4  | 7.4  | 7.4  | 7.4  | 7.4  | 7.4  | 10.8 |  |
|   | -----  |                |        |      |      |      |      |      |      |      |      |      |      |      |      |  |
|   | 5x5    | $\lambda$ [nm] | 693    | 707  | 732  | 746  | 758  | 772  | 784  | 798  | 809  | 821  | 839  | 851  | 861  |  |
|   | Camera | FWHM           | 4.0    | 4.4  | 5.1  | 4.7  | 7.1  | 6.8  | 6.8  | 8.5  | 6.8  | 7.1  | 10.1 | 8.1  | 8.5  |  |
|   | =====  |                |        |      |      |      |      |      |      |      |      |      |      |      |      |  |
|   |        |                | Band # | 13   | 14   | 15   | 16   | 17   | 18   | 19   | 20   | 21   | 22   | 23   | 24   |  |
|   | 4x4    | $\lambda$ [nm] | 616    | 626  | 638  |      |      |      |      |      |      |      |      |      |      |  |
|   | Camera | FWHM           | 13.4   | 15.5 | 15.5 |      |      |      |      |      |      |      |      |      |      |  |
|   | -----  |                |        |      |      |      |      |      |      |      |      |      |      |      |      |  |
|   | 5x5    | $\lambda$ [nm] | 872    | 881  | 891  | 900  | 910  | 924  | 932  | 940  | 948  | 955  | 961  | 966  |      |  |
|   | Camera | FWHM           | 8.8    | 10.9 | 12.2 | 15.0 | 12.9 | 15.3 | 14.2 | 18.7 | 19.4 | 25.0 | 17.7 | 15.3 |      |  |
